# Supplementary material
Source: publisher figshare collection journal article supplement (https://rs.figshare.com/ndownloader/files/14455952)
Supplement: Supplementary file 1 [file 14455952]

## Sheet: Sheet1
Supplementary Table 1: Species and sequences used in this study. Our previously published 15 species names and two newly generated in this study are highlighted in bold. The 33 phototransduction genes with sequence length after deleting gaps are also shown.
	Order	Species	ARR3	CNGA1	CNGA3	CNGB1	CNGB3	GNAT1	GNAT2	GNB1	GNB3	GNB5	GNGT2	GRK1	GRK7	GUCA1A	GUCA1B	GUCA1C	GUCY2D	GUCY2F	LWS	PDE6B	PDE6C	PDE6G	PDE6H	RCVRN	RGS9	RGS9BP	RH1	RH2	SAG	SLC24A1	SLC24A2	SWS1	SWS2
			948	1485	1548	1467	1299	585	684	987	741	939	162	1002	1491	444	549	360	2331	2970	804	2376	2391	225	210	381	1302	615	717	873	978	1785	1419	291	330
	Passeriformes	Acanthisitta chloris	XM_009084518.1	XM_009071957.1		XM_009077062.1	XM_009079625.1	XM_009071251.1		XM_009072504.1	XM_009069848.1	XM_009080760.1	XM_009083670.1		XM_009080059.1	XM_009076171.1	XM_009076170.1					XM_009072728.1	XM_009080338.1	XM_009076967.1		XM_009071776.1	XM_009084907.1	XM_009084675.1	XM_009080508.1		XM_009081798.1		XM_009078762.1
		Corvus brachyrhynchos	XM_017742808.1	XM_017744661.1	XM_008635797.2	XM_017740791.1	XM_017731060.1	XM_008632185.2	XM_008638005.2	XM_017744040.1	XM_008631818.2	XM_008640007.2	XM_008638473.2		XM_008644147.2	XM_008638956.2	XM_008638955.2	XM_008631699.2		XM_008634898.2		XM_017735455.1	XM_008643914.2		XM_017737906.1	XM_008643464.2	XM_017740766.1	XM_017740877.1	XM_008634462.2	XM_008644712.2	XM_017726117.1	XM_008637521.2	XM_008630854.2	XM_017739396.1
		Corvus cornix cornix	XM_019287708.2	XM_019286948.2	XM_010394208.2	XM_019288219.2	XM_010405009.3	XM_010389989.2	XM_010404485.2	XM_019289740.1	XM_010396114.3	XM_019280924.2			XM_010406101.3	XM_010404302.3	XM_010404303.3	XM_019283694.1				XM_010400047.3	XM_019293029.2		XM_010410731.3		XM_010410074.3	XM_010396516.3	XM_010390291.3	XM_010404388.2	XM_010390604.3	XM_010390948.3	XM_010392990.3
		Ficedula albicollis	XM_016298352.1	XM_005045329.1	XM_016306145.1	XM_016301066.1	XM_005042405.1	XM_005053059.1	XM_005059369.1	XM_005057595.2	XM_005038429.1	XM_005051957.1			XM_005051026.1	XM_005059217.1	XM_005059137.1	XM_005038763.2		XM_005038376.1		XM_005061009.2	XM_005048404.1	XM_016302689.1	XM_005039579.1		XM_005056180.2	XM_005052690.1	XM_005053322.1	XM_005059479.1	XM_016300740.1	XM_005051703.1	XM_005060899.1	XM_005061513.1
		Geospiza fortis	XM_005423296.1	XM_005415641.1	XM_005420012.1	XM_014307756.1	XM_014307783.1	XM_005422433.1	XM_005426800.1	XM_014309753.1	XM_005420602.1	XM_014306447.1		XM_005431226.1	XM_005424678.2	XM_005429666.1	XM_005429665.1	XM_005420514.1		XM_005427419.1		XM_005423595.1	XM_005416452.1	XM_005430521.1	XM_005421627.2		XM_014310208.1	XM_005426247.1	XM_005426641.1	XM_005428907.1	XM_014310914.1	XM_005424242.1	XM_005420859.1	XM_005430818.1
		Lepidothrix coronata	XM_017819169.1	XM_017805328.1	XM_017818398.1	XM_017824174.1	XM_017826461.1	XM_017819854.1	XM_017839438.1	XM_017831244.1		XM_017805248.1	XM_017837095.1		XM_017822332.1	XM_017821340.1	XM_017821322.1	XM_017808054.1		XM_017830070.1		XM_017822450.1	XM_017840128.1	XM_017811912.1	XM_017804273.1		XM_017812193.1	XM_017828796.1	XM_017827045.1		XM_017826236.1	XM_017830242.1	XM_017806050.1	XM_017838903.1
		Lonchura striata domestica	XM_021537724.1	XM_021556041.1	XM_021546676.1	XM_021541041.1	XM_021543260.1	XM_021533454.1	XM_021527645.1	XM_021529862.1	XM_021549130.1	XM_021537439.1	XM_021538467.1		XM_021536949.1	XM_021539474.1	XM_021539485.1	XM_021542405.1		XM_021533990.1		XM_021547978.1	XM_021540164.1	XM_021534211.1	XM_021552740.1		XM_021537029.1	XM_021540936.1	XM_021542529.1	XM_021535959.1	XM_021544401.1	XM_021552582.1	XM_021535459.1	XM_021546976.1
		Manacus vitellinus	XM_018070575.1	XM_008927435.2	XM_008931950.2	XM_018085572.1		XM_018068734.1		XM_018079478.1	XM_008925825.2	XM_018069763.1			XM_008925353.2	XM_008923776.2	XM_008923753.2	XM_008920865.2		XM_018085561.1		XM_008933723.2	XM_008929837.2		XM_008920224.2		XM_018073386.1	XM_018086270.1	XM_008926317.2	XM_018079608.1	XM_018083168.1	XM_008923098.2	XM_018080957.1
		Parus major	XM_015626114.1	XM_015623783.1	XM_019006823.1	XM_019007977.1	XM_019009213.1	XM_015640557.1	XM_015650692.2	XM_015648363.2	XM_015626957.2				XM_015637828.2	XM_015650576.2	XM_015650577.2	XM_015617981.2		XM_015642276.2		XM_015653327.2	XM_015633580.1		XM_019006588.1			XM_015639829.1	XM_015640790.1	XM_015650504.2	XM_015637274.1	XM_015638575.2	XM_015615373.2	XM_015615959.2
		Pseudopodoces humilis	XM_005526143.1	XM_005518021.2	XM_005516521.1	XM_014257110.1	XM_014253259.1	XM_005522141.1	XM_014258906.1	XM_014259188.1	XM_014253312.1	XM_005521485.2	XM_005532470.1	XM_005533376.1	XM_005527058.2	XM_005529397.1	XM_005529286.1	XM_005523981.2		XM_005531034.1		XM_005530913.1	XM_005520619.1	XM_005530678.1	XM_005519470.1			XM_014255509.1	XM_005521947.1	XM_005529357.1	XM_005529567.2	XM_005521641.2	XM_005522656.1	XM_005533413.1	XM_005534405.2
		Serinus canaria	XM_009090411.2	XM_009101461.1	XM_009085392.2	XM_018914806.1	XM_018911246.1	XM_009099528.2	XM_009097322.2	XM_018920383.1	XM_009102620.2	XM_018914078.1			XM_009089187.2	XM_009098390.1	XM_009098322.2	XM_009095472.2		XM_018909024.1	XM_009100678.2	XM_009096058.2	XM_009087295.2	XM_009094303.2	XM_009086621.2		XM_009094316.2	XM_018914522.1	XM_018924453.1	XM_009098361.2	XM_009089246.2	XM_018914005.1	XM_009093944.2	NM_001302100.1
		Sturnus vulgaris	XM_014886134.1	XM_014887939.1	XM_014891899.1	XM_014889014.1	XM_014870774.1	XM_014869580.1	XM_014872833.1	XM_014883964.1	XM_014884237.1	XM_014874127.1	XM_014889419.1		XM_014877924.1	XM_014892335.1	XM_014892340.1	XM_014882023.1			XM_014893396.1	XM_014882358.1	XM_014875393.1	XM_014887477.1	XM_014892420.1		XM_014882779.1	XM_014882122.1	XM_014874082.1	XM_014872613.1	XM_014879569.1	XM_014874589.1	XM_014870734.1	XM_014890794.1	XM_014893398.1
		Taeniopygia guttata	XM_002188607.1	XM_004174830.1	XM_002197117.3		XM_012571934.1		XM_002197747.3	XM_012570414.1	XM_012569894.1	XM_004176924.1			XM_002198662.3	XM_002196327.1	XM_002198614.1	XM_002188562.1		XM_002190021.2	NM_001076702.1	XM_002187904.3	XM_002190104.2	XM_002186996.2	XM_004175879.2		XM_002194103.3	XM_002186752.2	NM_001076695.1		XM_012575498.1	XM_002200038.1	XM_002191994.3	NM_001076704.1	AF222332.1
		Zonotrichia albicollis	XM_014267882.1	XM_005490060.1	XM_014266626.1	XM_014269101.1	XM_014275608.1	XM_005485477.1	XM_005492468.1		XM_005486048.1	XM_005483339.2			XM_005489456.2	XM_005492831.1	XM_005492830.1	XM_005492555.1		XM_014271354.1		XM_005486263.1	XM_005481219.2	XM_005497736.2			XM_014272666.1	XM_005490066.2	XM_005490154.1	NM_001314074.1	XM_005495132.2	XM_014264575.1	XM_005490931.2		KM516240.1
	Psittaciformes	Nestor notabilis		XM_010009200.1	XM_010018666.1		XM_010015564.1	XM_010019595.1	XM_010022092.1	XM_010021171.1	XM_010010148.1		XM_010016493.1		XM_010020750.1	XM_010024255.1	XM_010024254.1			XM_010019372.1		XM_010013079.1			XM_010019017.1		XM_010021114.1	XM_010021625.1			XM_010019293.1
		Platycercus elegans																			KF134493.1
		Melopsittacus undulatus																												XM_005142831.2
	Falconiformes	Falco cherrug	XM_005440982.1	XM_005433621.1	XM_005444736.2	XM_014286335.1	XM_014285122.1	XM_005432729.1	XM_005447007.1	XM_014278846.1	XM_005434323.2	XM_005435521.2	XM_005440051.2		XM_005443663.2	XM_005447103.1	XM_005447102.1	XM_005440523.1		XM_005440969.1		XM_005446863.2	XM_005432405.2	XM_005436345.2	XM_005441322.1	XM_005434283.2	XM_014286241.1	XM_005444620.2	XM_005443603.2	XM_005447040.1	XM_014281970.1	XM_005435578.1	XM_005441020.2	XM_005435460.1
		Falco peregrinus	XM_005242623.1	XM_005232154.1	XM_005228684.2	XM_013296778.1	XM_013295630.1	XM_005229797.1	XM_005239612.1	XM_013299616.1	XM_005235358.2	XM_005241438.1	XM_005236549.2		XM_005237711.2	XM_005230315.1	XM_005230316.1	XM_005237458.1		XM_005231153.1		XM_005232829.2	XM_005238928.2	XM_005237503.2	XM_005237358.1	XM_005235647.1	XM_013299210.1	XM_005229341.2	XM_005240222.2	XM_005239654.1	XM_013305328.1	XM_005235093.1	XM_013303041.1	XM_013297563.1
		Falco tinnunculus	Falco tinnunculus	Falco tinnunculus	Falco tinnunculus	Falco tinnunculus	Falco tinnunculus			Falco tinnunculus	Falco tinnunculus	Falco tinnunculus	Falco tinnunculus	Falco tinnunculus	Falco tinnunculus	Falco tinnunculus		Falco tinnunculus	Falco tinnunculus	Falco tinnunculus	Falco tinnunculus		Falco tinnunculus	Falco tinnunculus	Falco tinnunculus	Falco tinnunculus		Falco tinnunculus	Falco tinnunculus				Falco tinnunculus	Falco tinnunculus	Falco tinnunculus
		Falco subbuteo	Falco subbuteo	Falco subbuteo	Falco subbuteo	Falco subbuteo	Falco subbuteo			Falco subbuteo	Falco subbuteo		Falco subbuteo	Falco subbuteo	Falco subbuteo	Falco subbuteo	Falco subbuteo	Falco subbuteo	Falco subbuteo		Falco subbuteo		Falco subbuteo	Falco subbuteo	Falco subbuteo	Falco subbuteo		Falco subbuteo	Falco subbuteo				Falco subbuteo	Falco subbuteo
	Cariamiformes	Cariama cristata		XM_009705724.1	XM_009699845.1		XM_009704152.1			XM_009696275.1	XM_009698108.1	XM_009701956.1	XM_009707171.1		XM_009705477.1	XM_009697933.1	XM_009698438.1	XM_009709000.1		XM_009699393.1							XM_009698609.1	XM_009707693.1			XM_009707509.1
Birds	Coraciiformes	Merops nubicus		XM_008942537.1	XM_008949511.1		XM_008944848.1			XM_008936624.1			XM_008948756.1		XM_008943314.1	XM_008940690.1	XM_008947904.1			XM_008947089.1		XM_008937584.1	XM_008937353.1		XM_008935369.1		XM_008941969.1	XM_008946597.1		XM_008939766.1			XM_008950249.1
	Piciformes	Picoides pubescens	XM_009896857.1	XM_009899291.1	XM_009900150.1			XM_009907649.1		XM_009906809.1	XM_009899611.1	XM_009906453.1	XM_009900126.1	XM_009910212.1	XM_009900946.1	XM_009896251.1	XM_009896262.1	XM_009896984.1		XM_009906949.1		XM_009908770.1	XM_009897738.1	XM_009897867.1	XM_009898496.1		XM_009902666.1	XM_009902745.1	XM_009904062.1		XM_009900977.1	XM_009903941.1	XM_009906620.1
		Picus canus	Picus canus	Picus canus	Picus canus	Picus canus		Picus canus		Picus canus	Picus canus	Picus canus	Picus canus		Picus canus	Picus canus	Picus canus	Picus canus	Picus canus	Picus canus	Picus canus		Picus canus	Picus canus		Picus canus		Picus canus	Picus canus	Picus canus			Picus canus		Picus canus
	Bucerotiformes	Buceros rhinoceros silvestris		XM_010134680.1	XM_010141844.1		XM_010134214.1			XM_010145126.1	XM_010141495.1		XM_010139958.1		XM_010146089.1	XM_010136441.1	XM_010136440.1			XM_010145269.1		XM_010137072.1			XM_010132978.1		XM_010145716.1	XM_010144613.1	XM_010145186.1		XM_010134068.1		XM_010133328.1
		Upupa epops		Upupa epops	Upupa epops		Upupa epops			Upupa epops	Upupa epops	Upupa epops	Upupa epops		Upupa epops			Upupa epops	Upupa epops		Upupa epops		Upupa epops	Upupa epops	Upupa epops			Upupa epops	Upupa epops					Upupa epops
	Trogoniformes	Apaloderma vittatum		XM_009877384.1	XM_009865575.1					XM_009867481.1	XM_009865753.1	XM_009875792.1	XM_009864694.1		XM_009869427.1	XM_009876033.1	XM_009876032.1					XM_009878330.1	XM_009868856.1		XM_009874368.1		XM_009872113.1	XM_009868140.1	XM_009875238.1		XM_009870297.1
	Leptosomiformes	Leptosomus discolor	XM_009960763.1	XM_009958198.1	XM_009960398.1	XM_009957982.1				XM_009952373.1	XM_009956851.1	XM_009958800.1			XM_009947434.1	XM_009956159.1	XM_009956158.1					XM_009956828.1			XM_009950014.1		XM_009947777.1	XM_009961710.1	XM_009949111.1	XM_009959488.1	XM_009946614.1
	Coliiformes	Colius striatus		XM_010200484.1	XM_010203491.1			XM_010206160.1		XM_010204961.1	XM_010210420.1	XM_010199805.1	XM_010198862.1		XM_010209129.1	XM_010206368.1	XM_010206367.1					XM_010208627.1			XM_010203112.1		XM_010195698.1	XM_010198662.1			XM_010195581.1
	Strigiformes	Tyto alba		XM_009964074.1			XM_009964808.1				XM_009962260.1	XM_009969937.1			XM_009974265.1	XM_009965774.1	XM_009972446.1					XM_009967470.1			XM_009971651.1		XM_009973627.1	XM_009974167.1			XM_009967181.1
		Asio otus	Asio otus	Asio otus	Asio otus	Asio otus	Asio otus	Asio otus		Asio otus			Asio otus	Asio otus	Asio otus				Asio otus	Asio otus	Asio otus		Asio otus	Asio otus	Asio otus	Asio otus		Asio otus	Asio otus	Asio otus			Asio otus		Asio otus
		Tyto longimembris		Tyto longimembris	Tyto longimembris		Tyto longimembris	Tyto longimembris		Tyto longimembris	Tyto longimembris	Tyto longimembris	Tyto longimembris		Tyto longimembris	Tyto longimembris	Tyto longimembris	Tyto longimembris	Tyto longimembris	Tyto longimembris	Tyto longimembris				Tyto longimembris	Tyto longimembris		Tyto longimembris	Tyto longimembris						Tyto longimembris
		Bubo bubo	Bubo bubo	Bubo bubo	Bubo bubo	Bubo bubo		Bubo bubo		Bubo bubo	Bubo bubo	Bubo bubo	Bubo bubo	Bubo bubo	Bubo bubo		Bubo bubo		Bubo bubo	Bubo bubo	Bubo bubo		Bubo bubo	Bubo bubo	Bubo bubo	Bubo bubo		Bubo bubo	Bubo bubo	Bubo bubo			Bubo bubo		Bubo bubo
		Otus scops	Otus scops	Otus scops	Otus scops		Otus scops	Otus scops		Otus scops	Otus scops	Otus scops		Otus scops	Otus scops		Otus scops		Otus scops		Otus scops		Otus scops	Otus scops		Otus scops		Otus scops	Otus scops				Otus scops		Otus scops
		Athene noctua	Athene noctua	Athene noctua	Athene noctua					Athene noctua	Athene noctua	Athene noctua	Athene noctua	Athene noctua	Athene noctua	Athene noctua	Athene noctua		Athene noctua	Athene noctua	Athene noctua		Athene noctua	Athene noctua	Athene noctua	Athene noctua		Athene noctua	Athene noctua	Athene noctua			Athene noctua		Athene noctua
		Otus bakkamoena	Otus bakkamoena	Otus bakkamoena		Otus bakkamoena		Otus bakkamoena		Otus bakkamoena	Otus bakkamoena	Otus bakkamoena	Otus bakkamoena	Otus bakkamoena	Otus bakkamoena		Otus bakkamoena		Otus bakkamoena	Otus bakkamoena	Otus bakkamoena			Otus bakkamoena	Otus bakkamoena	Otus bakkamoena		Otus bakkamoena	Otus bakkamoena				Otus bakkamoena		Otus bakkamoena
	Accipitriformes	Aquila chrysaetos canadensis	XM_011580388.1	XM_011582786.1	XM_011583662.1	XM_011573720.1	XM_011600194.1	XM_011573601.1	XM_011592093.1	XM_011585403.1	XM_011587524.1	XM_011592672.1	XM_011593996.1	XM_011601099.1	XM_011577587.1	XM_011593220.1	XM_011593221.1	XM_011584120.1		XM_011584817.1		XM_011600532.1	XM_011576234.1	XM_011586753.1	XM_011600570.1		XM_011586794.1	XM_011574125.1	XM_011573226.1	XM_011592210.1	XM_011577391.1	XM_011595519.1	XM_011597655.1	XM_011600382.1
		Haliaeetus albicilla		XM_009919198.1	XM_009917872.1	XM_009924536.1	XM_009920896.1			XM_009921518.1	XM_009920688.1		XM_009923758.1		XM_009919940.1		XM_009927801.1					XM_009930124.1	XM_009929017.1		XM_009927258.1		XM_009924291.1	XM_009923575.1	XM_009914629.1	XM_009928076.1	XM_009924799.1
		Haliaeetus leucocephalus	XM_010572372.1	XM_010574556.1	XM_010575776.1	XM_010585174.1	XM_010568156.1	XM_010572899.1	XM_010584582.1	XM_010577455.1	XM_010567574.1	XM_010571832.1	XM_010585489.1	XM_010571164.1	XM_010568334.1	XM_010578976.1	XM_010578989.1	XM_010567304.1		XM_010576748.1		XM_010569168.1	XM_010564932.1	XM_010578562.1	XM_010569194.1		XM_010578595.1	XM_010585106.1	XM_010570157.1	XM_010584680.1	XM_010568189.1	XM_010572071.1	XM_010564458.1	XM_010568780.1
		Circus melanoleucos	Circus melanoleucos		Circus melanoleucos	Circus melanoleucos	Circus melanoleucos			Circus melanoleucos	Circus melanoleucos	Circus melanoleucos	Circus melanoleucos	Circus melanoleucos	Circus melanoleucos	Circus melanoleucos	Circus melanoleucos	Circus melanoleucos	Circus melanoleucos	Circus melanoleucos	Circus melanoleucos		Circus melanoleucos	Circus melanoleucos	Circus melanoleucos	Circus melanoleucos		Circus melanoleucos	Circus melanoleucos				Circus melanoleucos	Circus melanoleucos	Circus melanoleucos
		Elanus caeruleus	Elanus caeruleus	Elanus caeruleus		Elanus caeruleus		Elanus caeruleus		Elanus caeruleus	Elanus caeruleus	Elanus caeruleus	Elanus caeruleus		Elanus caeruleus	Elanus caeruleus		Elanus caeruleus	Elanus caeruleus	Elanus caeruleus	Elanus caeruleus		Elanus caeruleus	Elanus caeruleus	Elanus caeruleus	Elanus caeruleus		Elanus caeruleus	Elanus caeruleus	Elanus caeruleus			Elanus caeruleus
		Butastur indicus	Butastur indicus	Butastur indicus	Butastur indicus	Butastur indicus	Butastur indicus			Butastur indicus		Butastur indicus		Butastur indicus	Butastur indicus	Butastur indicus	Butastur indicus	Butastur indicus	Butastur indicus	Butastur indicus	Butastur indicus		Butastur indicus	Butastur indicus	Butastur indicus	Butastur indicus		Butastur indicus	Butastur indicus	Butastur indicus			Butastur indicus	Butastur indicus	Butastur indicus
		Accipiter virgatus		Accipiter virgatus	Accipiter virgatus	Accipiter virgatus	Accipiter virgatus				Accipiter virgatus	Accipiter virgatus	Accipiter virgatus	Accipiter virgatus	Accipiter virgatus	Accipiter virgatus	Accipiter virgatus	Accipiter virgatus	Accipiter virgatus	Accipiter virgatus	Accipiter virgatus		Accipiter virgatus	Accipiter virgatus	Accipiter virgatus	Accipiter virgatus		Accipiter virgatus	Accipiter virgatus				Accipiter virgatus	Accipiter virgatus	Accipiter virgatus
		Aegypius monachus	Aegypius monachus	Aegypius monachus	Aegypius monachus	Aegypius monachus	Aegypius monachus	Aegypius monachus		Aegypius monachus	Aegypius monachus	Aegypius monachus	Aegypius monachus	Aegypius monachus	Aegypius monachus	Aegypius monachus		Aegypius monachus	Aegypius monachus	Aegypius monachus	Aegypius monachus		Aegypius monachus	Aegypius monachus	Aegypius monachus	Aegypius monachus		Aegypius monachus	Aegypius monachus	Aegypius monachus			Aegypius monachus		Aegypius monachus
	Pelecaniformes	Egretta garzetta	XM_009649676.1	XM_009642319.1	XM_009637650.1	XM_009643372.1	XM_009635567.1	XM_009639212.1	XM_009640452.1	XM_009648125.1	XM_009639191.1	XM_009643996.1	XM_009644387.1		XM_009639746.1	XM_009639402.1	XM_009639401.1	XM_009637433.1		XM_009637119.1		XM_009636824.1	XM_009642078.1		XM_009645578.1		XM_009646155.1	XM_009638040.1	XM_009633823.1	XM_009638199.1	XM_009639514.1	XM_009647099.1	XM_009640022.1
		Nipponia nippon	XM_009465248.1	XM_009474281.1	XM_009472565.1	XM_009470488.1	XM_009476549.1			XM_009460885.1	XM_009476221.1	XM_009470275.1	XM_009464598.1		XM_009469255.1	XM_009462418.1	XM_009462417.1	XM_009466724.1		XM_009476480.1		XM_009470600.1	XM_009465442.1	XM_009466908.1	XM_009463962.1	XM_009475029.1	XM_009466923.1	XM_009465758.1	XM_009469932.1	XM_009465641.1	XM_009460477.1	XM_009470026.1	XM_009471004.1	XM_009468025.1
		Pelecanus crispus	XM_009486377.1	XM_009489703.1	XM_009486998.1	XM_009489553.1				XM_009480117.1	XM_009479763.1	XM_009489798.1	XM_009482180.1		XM_009491556.1	XM_009491610.1	XM_009477872.1					XM_009487556.1	XM_009485271.1		XM_009482948.1			XM_009479811.1	XM_009479489.1	XM_009482323.1	XM_009484034.1
		Phalacrocorax carbo		XM_009512270.1	XM_009502048.1					XM_009502144.1	XM_009514349.1	XM_009511053.1				XM_009513743.1	XM_009515116.1					XM_009507731.1			XM_009512918.1			XM_009504077.1		XM_009505908.1	XM_009511829.1
	Procellariiformes	Fulmarus glacialis		XM_009585619.1	XM_009584322.1	XM_009585568.1	XM_009573540.1			XM_009581721.1	XM_009581534.1	XM_009575656.1	XM_009579330.1			XM_009577841.1							XM_009574037.1		XM_009579931.1		XM_009577031.1	XM_009577659.1	XM_009586464.1	XM_009578921.1	XM_009578474.1
	Sphenisciformes	Aptenodytes forsteri	XM_009287994.1	XM_009283598.1	XM_009281739.2	XM_009290804.2	XM_009276049.1	XM_009274765.1		XM_009274152.2	XM_009287124.1		XM_009287788.1		XM_009286699.2	XM_009272736.1	XM_009272737.1	XM_009282883.1				XM_009274643.2	XM_009277765.2		XM_009290079.1	XM_009279144.1	XM_019473190.1	XM_009275266.1	XM_009283802.1	XM_009272939.1	XM_009284303.2	XM_009280419.1	XM_009274296.1
		Pygoscelis adeliae	XM_009326669.1	XM_009335221.1	XM_009323639.1	XM_009318866.1	XM_009332525.1	XM_009324287.1		XM_009325145.1	XM_009328823.1	XM_009330995.1	XM_009330135.1		XM_009325086.1	XM_009331945.1	XM_009331946.1	XM_009323882.1		XM_009321936.1		XM_009331513.1	XM_009334808.1		XM_009322460.1		XM_009323769.1	XM_009320276.1	XM_009320102.1		XM_009319077.1	XM_009321454.1	XM_009328074.1
	Gaviiformes	Gavia stellata		XM_009816975.1						XM_009818086.1	XM_009812116.1	XM_009808042.1	XM_009807251.1		XM_009811591.1	XM_009812214.1	XM_009813918.1			XM_009819639.1		XM_009817924.1	XM_009808264.1		XM_009813802.1		XM_009819218.1	XM_009819385.1		XM_009818094.1	XM_009820980.1
	Phaethontiformes	Phaethon lepturus		XM_010286076.1	XM_010290911.1					XM_010289399.1	XM_010292212.1		XM_010289179.1		XM_010290560.1	XM_010296574.1	XM_010287986.1					XM_010294060.1	XM_010285283.1		XM_010288076.1		XM_010288277.1	XM_010293785.1		XM_010290942.1
	Eurypygiformes	Eurypyga helias		XM_010151700.1	XM_010151495.1						XM_010151195.1	XM_010160275.1	XM_010151550.1			XM_010148586.1	XM_010148585.1			XM_010157406.1		XM_010159239.1	XM_010154774.1		XM_010150982.1		XM_010152911.1	XM_010159608.1	XM_010151766.1	XM_010158779.1	XM_010149237.1
	Charadriiformes	Calidris pugnax	XM_014954978.1	XM_014954274.1	XM_014960142.1	XM_014946881.1	XM_014965200.1			XM_014943883.1	XM_014957099.1	XM_014944727.1	XM_014958914.1		XM_014951785.1	XM_014948444.1		XM_014947173.1		XM_014960608.1		XM_014958101.1	XM_014965814.1	XM_014956598.1	XM_014963896.1	XM_014962290.1		XM_014942293.1	XM_014946656.1	XM_014953611.1	XM_014952117.1	XM_014946101.1	XM_014952603.1	XM_014956629.1
		Charadrius vociferus	XM_009881668.1	XM_009885014.1	XM_009883097.1	XM_009894505.1	XM_009891943.1	XM_009887753.1		XM_009889610.1	XM_009892438.1	XM_009885764.1	XM_009892196.1		XM_009890012.1	XM_009888459.1	XM_009888433.1	XM_009888489.1		XM_009881258.1		XM_009883306.1	XM_009888693.1		XM_009894387.1		XM_009894771.1	XM_009881389.1	XM_009882892.1	XM_009888260.1	XM_009886523.1	XM_009886858.1	XM_009891506.1
	Gruiformes	Balearica regulorum gibbericeps		XM_010307415.1	XM_010312453.1	XM_010306380.1				XM_010313272.1	XM_010310110.1	XM_010305637.1	XM_010298484.1		XM_010310360.1	XM_010313430.1	XM_010309279.1					XM_010309455.1			XM_010305629.1		XM_010298723.1	XM_010306649.1			XM_010303716.1	XM_010305061.1
		Grus americana																			KM508487.1
	Opisthocomiformes	Opisthocomus hoazin		XM_009937260.1	XM_009943883.1	XM_009942666.1	XM_009945598.1	XM_009936613.1		XM_009934444.1	XM_009932019.1	XM_009940227.1			XM_009932090.1	XM_009938624.1	XM_009938623.1	XM_009941228.1		XM_009931043.1		XM_009939060.1	XM_009935670.1		XM_009940135.1		XM_009935740.1	XM_009945354.1	XM_009939978.1	XM_009941385.1	XM_009932780.1	XM_009945420.1	XM_009942426.1
	Caprimulgiformes	Calypte anna	XM_008501198.1	XM_008491909.1	XM_008498128.1	XM_008496207.1	XM_008506418.1	XM_008498982.1	XM_008499386.1	XM_008503603.1	XM_008499125.1	XM_008492083.1	XM_008499966.1	XM_008501985.1	XM_008491042.1	XM_008490590.1	XM_008490563.1	XM_008496812.1		XM_008495214.1		XM_008492550.1	XM_008502008.1	XM_008494547.1	XM_008496732.1	XM_008493872.1	XM_008494667.1	XM_008491613.1	XM_008501365.1	XM_008499430.1	XM_008490998.1	XM_008506146.1	XM_008505838.1
		Caprimulgus carolinensis		XM_010176563.1	XM_010169924.1	XM_010168072.1				XM_010170802.1	XM_010178219.1	XM_010165078.1	XM_010176236.1		XM_010177034.1	XM_010165183.1	XM_010165184.1					XM_010172619.1	XM_010162071.1					XM_010163854.1	XM_010172233.1	XM_010172709.1	XM_010172361.1
		Chaetura pelagica	XM_009996621.1	XM_010006139.1	XM_009998719.1	XM_010004391.1	XM_010006495.1	XM_009995801.1		XM_010005192.1	XM_009998540.1	XM_009994546.1	XM_010000323.1		XM_010001641.1	XM_010001787.1	XM_010001777.1	XM_009993364.1		XM_009996743.1		XM_010000467.1	XM_010000040.1	XM_010002715.1	XM_009999016.1		XM_010002705.1	XM_010006163.1		XM_010007085.1	XM_009993540.1	XM_009995290.1	XM_010008434.1
	Otidiformes	Chlamydotis macqueenii	XM_010125209.1	XM_010127914.1	XM_010121306.1	XM_010129584.1	XM_010128192.1			XM_010126953.1	XM_010119976.1	XM_010125527.1	XM_010121525.1		XM_010117389.1	XM_010116772.1	XM_010116762.1	XM_010119889.1				XM_010120003.1			XM_010116080.1		XM_010125962.1	XM_010116505.1				XM_010116998.1
	Musophagiformes	Tauraco erythrolophus		XM_009986138.1	XM_009991510.1					XM_009991697.1	XM_009980411.1		XM_009984029.1			XM_009984452.1	XM_009984441.1			XM_009985020.1		XM_009980228.1	XM_009990514.1					XM_009989905.1	XM_009984861.1	XM_009977732.1	XM_009988515.1
	Cuculiformes	Cuculus canorus	XM_009555275.1	XM_009559979.1	XM_009557937.1	XM_009571216.1	XM_009558082.1	XM_009569363.1	XM_009564334.1	XM_009561543.1	XM_009566696.1	XM_009556358.1	XM_009571122.1		XM_009565935.1	XM_009561758.1	XM_009561743.1	XM_009557154.1	XM_009566096.1	XM_009566428.1		XM_009564697.1	XM_009570661.1	XM_009561128.1	XM_009571554.1	XM_009563890.1	XM_009563989.1	XM_009567931.1	XM_009565824.1	XM_009569795.1	XM_009568965.1	XM_009567592.1	XM_009565326.1	XM_009563301.1
	Mesitornithiformes	Mesitornis unicolor	XM_010192432.1	XM_010187531.1	XM_010185929.1	XM_010186515.1	XM_010192414.1				XM_010180684.1	XM_010192376.1	XM_010192877.1		XM_010188026.1	XM_010191888.1	XM_010191889.1			XM_010193353.1			XM_010182800.1		XM_010180411.1			XM_010187498.1	XM_010188920.1	XM_010193407.1
	Pterocliformes	Pterocles gutturalis		XM_010087939.1	XM_010073663.1	XM_010075027.1	XM_010081052.1			XM_010076611.1	XM_010074822.1	XM_010080475.1	XM_010073529.1		XM_010087835.1	XM_010082717.1	XM_010078372.1			XM_010073470.1		XM_010085261.1			XM_010079308.1		XM_010075453.1	XM_010078102.1			XM_010080329.1
	Columbiformes	Columba livia	XM_021297097.1	XM_005501361.1	XM_021287676.1	XM_021279807.1	XM_021280250.1	XM_005508861.2	XM_005510344.2	XM_013371117.2	XM_005506284.2	XM_021300885.1	XM_021295589.1		XM_005505893.3	XM_005510415.2	XM_005510414.3	XM_021287715.1			XM_013370985.2		XM_005506960.3	XM_005511879.2	XM_005515078.2		XM_021300372.1	XM_021282044.1	XM_021296597.1		XM_021279842.1	XM_005500925.2	XM_005508138.3	NM_001282821.1	NM_001310048.1
	Galliformes	Coturnix japonica	XM_015860067.1	XM_015862240.1	XM_015851017.1	XM_015873787.1	XM_015855808.1	XM_015874655.1	XM_015885040.1	XM_015882211.1	XM_015872816.1	XM_015872849.1	XM_015885628.1		XM_015871490.1	XM_015885223.1	XM_015885231.1	XM_015877749.1		XM_015852470.1		XM_015849573.1	XM_015867156.1	XM_015879940.1	XM_015859569.1	XM_015851344.1	XM_015880054.1	XM_015874031.1	XM_015874845.1	XM_015885397.1	XM_015871037.1	XM_015873284.1	XM_015849065.1
		Gallus gallus	NM_001097533.1	NM_205220.2	NM_205221.1	XM_015292310.1	XM_015282847.1	NM_204691.1	XM_015298691.1	NM_001012835.2		NM_001293242.2	NM_001302108.1	NM_204695.1	XM_426681.4	NM_204320.2	NM_001007881.2	XM_015297550.1		XM_015280866.1	NM_205440.1	NM_001318440.1	NM_204986.1	NM_204445.2	NM_204408.1	NM_205514.1	XM_015279956.1	NM_204505.1	NM_001030606.1	M92038.1	XM_015277209.1	NM_001001773.1	NM_001001772.1		M92037.1
		Meleagris gallopavo	XM_010715098.2	XM_019615190.1	XM_019622950.1	XM_019619659.1		XM_010718376.2			XM_019618052.1	XM_010717248.2	XM_010724563.2		XM_003209080.3	XM_003212958.3	XM_003212957.3	XM_010721364.1					XM_019617665.1	XM_003211487.3	XM_019614156.1			XM_010717755.2	XM_003210211.3	XM_003212975.3	XM_019619016.1	XM_003209586.3	XM_010725700.2
		Numida meleagris	XM_021406567.1	XM_021396801.1	XM_021412464.1	XM_021407993.1	XM_021386407.1	XM_021409893.1		XM_021417633.1	XM_021395968.1	XM_021407020.1	XM_021378094.1		XM_021394489.1	XM_021377534.1	XM_021377234.1	XM_021400963.1		XM_021383364.1		XM_021380751.1	XM_021397869.1	XM_021414440.1	XM_021415345.1		XM_021414608.1	XM_021408423.1	XM_021409943.1	XM_021377239.1	XM_021394969.1	XM_021407934.1	XM_021380975.1
	Anseriformes	Anas platyrhynchos	XM_021272436.1	XM_021277875.1		XM_021272769.1			XM_005015067.3	XM_013091717.2	XM_013096824.2	XM_021279349.1	XM_005026145.3		XM_021279201.1	XM_005023319.2	XM_021274983.1	XM_021275426.1		XM_021275412.1		XM_021272087.1	XM_005013598.3		XM_013104208.2		XM_021269954.1	XM_005020244.2	XM_005012054.3	XM_005026842.3	XM_005029778.3	XM_013095777.2	XM_021268028.1
		Anser cygnoides domesticus	XM_013192240.1	XM_013172826.1	XM_013180788.1	XM_013176568.1	XM_013172391.1		XM_013202184.1	XM_013194721.1	XM_013199541.1	XM_013177294.1	XM_013200215.1		XM_013181510.1	XM_013189574.1	XM_013189564.1	XM_013186157.1		XM_013191257.1		XM_013188248.1	XM_013191422.1	XM_013201723.1	XM_013196393.1		XM_013179092.1	XM_013202343.1	XM_013182260.1	XM_013197051.1	XM_013188028.1	XM_013193235.1	XM_013194034.1
	Tinamiformes	Tinamus guttatus	XM_010218533.1	XM_010219747.1	XM_010216010.1	XM_010217368.1	XM_010219231.1	XM_010220864.1		XM_010225471.1	XM_010212380.1	XM_010218176.1	XM_010224002.1		XM_010227692.1	XM_010216853.1	XM_010216829.1	XM_010223908.1		XM_010221726.1		XM_010219962.1	XM_010211359.1		XM_010212889.1			XM_010213989.1	XM_010222333.1	XM_010213423.1	XM_010220754.1	XM_010221139.1	XM_010226161.1
	Apterygiformes	Apteryx australis mantelli	XM_013944711.1	XM_013949436.1	XM_013954233.1		XM_013956796.1	XM_013955513.1		XM_013944197.1	XM_013958143.1	XM_013957290.1	XM_013950275.1		XM_013944315.1		XM_013950496.1	XM_013950066.1		XM_013950314.1		XM_013940097.1	XM_013951146.1		XM_013947400.1		XM_013953109.1	XM_013941107.1	XM_013954914.1	XM_013957513.1	XM_013942678.1	XM_013946443.1	XM_013948237.1
	Struthioniformes	Struthio camelus australis	XM_009687631.1	XM_009682026.1	XM_009666371.1	XM_009666050.1	XM_009674702.1	XM_009673085.1		XM_009671587.1	XM_009685125.1	XM_009681394.1	XM_009675299.1		XM_009688963.1	XM_009672170.1	XM_009672171.1	XM_009675070.1		XM_009688330.1		XM_009687602.1	XM_009677797.1		XM_009677572.1		XM_009679004.1	XM_009678365.1	XM_009681156.1	XM_009671828.1	XM_009669714.1	XM_009681170.1	XM_009677024.1
		Struthio camelus	Struthio camelus	Struthio camelus	Struthio camelus	Struthio camelus			Struthio camelus	Struthio camelus	Struthio camelus		Struthio camelus	Struthio camelus	Struthio camelus	Struthio camelus	Struthio camelus	Struthio camelus		Struthio camelus	Struthio camelus			Struthio camelus	Struthio camelus			Struthio camelus	Struthio camelus				Struthio camelus	Struthio camelus	Struthio camelus
	Casuariiformes	Dromaius novaehollandiae	Dromaius novaehollandiae	Dromaius novaehollandiae		Dromaius novaehollandiae	Dromaius novaehollandiae	Dromaius novaehollandiae		Dromaius novaehollandiae	Dromaius novaehollandiae	Dromaius novaehollandiae	Dromaius novaehollandiae	Dromaius novaehollandiae	Dromaius novaehollandiae	Dromaius novaehollandiae				Dromaius novaehollandiae		Dromaius novaehollandiae		Dromaius novaehollandiae	Dromaius novaehollandiae	Dromaius novaehollandiae		Dromaius novaehollandiae	Dromaius novaehollandiae	Dromaius novaehollandiae					Dromaius novaehollandiae
	Squamata	Anolis carolinensis	XM_008123817.2	XM_016996201.1			XM_016992957.1	XM_003217555.3	XM_008109433.2		XM_003227101.3	XM_008120535.2	XM_003222630.3	XM_003228508.3	XM_003218251.3	XM_003220450.3	XM_016993341.1	XM_003219082.3	XM_016996995.1			XM_003223349.3	XM_008115341.2	XM_008104126.2	XM_008110790.2	XM_016996070.1	XM_003224702.3	XM_016997402.1	NM_001291387.1	NM_001291394.1	XM_016992137.1		XM_008103482.2		AF133907.1
		Gekko japonicus			XM_015419657.1	XM_015411181.1	XM_015421424.1	XM_015421244.1	XM_015423556.1	XM_015417955.1	XM_015418805.1	XM_015418660.1	XM_015409237.1	XM_015423893.1	XM_015413472.1	XM_015410642.1	XM_015410644.1	XM_015427339.1			XM_015415465.1		XM_015406638.1		XM_015421319.1	XM_015414417.1	XM_015406006.1	XM_015414864.1			XM_015426813.1		XM_015427773.1		XM_015419621.1
		Pogona vitticeps	XM_020784393.1	XM_020789663.1	XM_020809552.1	XM_020797945.1	XM_020804969.1	XM_020791464.1	XM_020805272.1		XM_020804142.1		XM_020814742.1	XM_020809620.1	XM_020792577.1	XM_020780665.1	XM_020780636.1	XM_020806361.1	XM_020809626.1		XM_020793072.1		XM_020782886.1	XM_020813268.1	XM_020815481.1	XM_020798790.1	XM_020806442.1	XM_020799228.1	XM_020813194.1	XM_020795911.1	XM_020787352.1		XM_020790340.1	XM_020812457.1
		Protobothrops mucrosquamatus		XM_015828517.1	XM_015829790.1	XM_015812080.1	XM_015813093.1	XM_015824755.1	XM_015821725.1		XM_015814059.1	XM_015823706.1	XM_015810475.1			XM_015821339.1	XM_015821340.1	XM_015822416.1			XM_015812260.1		XM_015822696.1	XM_015815331.1	XM_015814449.1		XM_015810365.1	XM_015821677.1	XM_015823472.1		XM_015813710.1		XM_015825096.1	XM_015825841.1
		Python bivittatus		XM_007436672.1	XM_007428645.1	XM_007436234.1	XM_007432317.1	XM_007427679.1	XM_015887948.1	XM_007422563.1	XM_007420428.1	XM_007422185.1	XM_007428917.1		XM_007434301.1	XM_007425526.1	XM_007425521.1		XM_007426696.1		XM_007420519.1		XM_007431756.2	XM_007419845.1	XM_007423196.1	XM_007426840.1	XM_007421612.1		XM_007423262.1		XM_015890389.1		XM_007423474.1	XM_007441636.1
		Thamnophis sirtalis		XM_014057323.1	XM_014064417.1	XM_014064699.1		XM_014053833.1	XM_014076000.1	XM_014056677.1		XM_014075092.1	XM_014074938.1		XM_014057422.1						XM_014068735.1			XM_014065874.1	XM_014052235.1	XM_014052949.1		XM_014068496.1	XM_014059138.1		XM_014074552.1		XM_014057751.1
Reptiles		Uta stansburiana																									DQ103517.1			DQ100324.1					DQ100326.1
		Podarcis sicula																												AY941829.1
	Testudines	Chelonia mydas	XM_007055279.1			XM_007063276.1	XM_007052954.1	XM_007052675.1	XM_007067539.1	XM_007070180.1	XM_007069630.1	XM_007056365.1	XM_007061914.1			XM_007059611.1	XM_007059610.1	XM_007057536.1					XM_007053002.1	XM_007070928.1	XM_007064024.1		XM_007055127.1	XM_007058651.1	XM_007059947.1		XM_007052633.1	XM_007059534.1	XM_007061681.1	XM_007067421.1
		Chrysemys picta bellii	XM_008166514.1	XM_008163458.1	XM_005283202.1	XM_008174552.1	XM_008169505.1	XM_005289348.1	XM_005311004.2	XM_005292938.2		XM_005305066.2	XM_005301912.2		XM_008171473.1	XM_008171756.1	XM_005303568.1	XM_005283606.1			XM_005281282.1		XM_005292545.1	XM_008167659.1	XM_008178784.1	XM_005312058.1	XM_008167627.1	XM_005289900.1	XM_008168043.1		XM_008174947.1	XM_005305371.2	XM_005297688.2	XM_005281289.1	XM_005309675.1
		Pelodiscus sinensis	XM_014568831.1	XM_006113511.1	XM_006137386.2	XM_006128067.2	XM_014581634.1		XM_006132159.2	XM_006119216.2	XM_006124147.2	XM_006118514.2	XM_006120447.2	XM_006112157.2	XM_006119870.2	XM_006118766.2		XM_006116810.2	XM_014570052.1		XM_014581850.1	XM_014579541.1	XM_014581836.1		XM_006125879.2	XM_014581244.1	XM_014569300.1	XM_006121234.2	XM_006132837.2				XM_014576988.1		XM_006119345.2
	Crocodilia	Alligator mississippiensis	XM_019487888.1	XM_019481206.1	XM_006272092.3	XM_019497268.1	XM_019486440.1	XM_006265542.3	XM_019492490.1	XM_014610405.2	XM_006273390.2	XM_019477851.1	XM_019482605.1		XM_006263322.2	XM_006268077.2	XM_006268078.3	XM_019476042.1	XM_019493803.1	XM_019479388.1	XM_006269029.2	XM_006259253.3	XM_019484244.1	XM_019488917.1	XM_019480882.1	XM_006266510.3	XM_019494452.1	XM_014595577.2	NM_001287282.1		XM_019486097.1	XM_014605979.2	XM_019480761.1		XM_006269051.2
		Alligator sinensis	XM_006020489.2	XM_006019029.1	XM_006017072.2	XM_014518305.1	XM_014518510.1	XM_006023742.1	XM_006034361.2	XM_006016192.2	XM_006038369.1	XM_006017948.2	XM_006023304.2	XM_006038657.1	XM_006027279.2	XM_006035840.1	XM_006035839.1	XM_006027017.2	XM_014526891.1	XM_014519141.1	XM_006032034.1	XM_006019666.2	XM_006029435.2	XM_006034803.2	XM_006024194.1	XM_006026769.1	XM_006017349.1	XM_006016607.2	XM_006039400.1		XM_006015994.2	XM_014518247.1
		Crocodylus porosus	XM_019536243.1	XM_019553480.1	XM_019529448.1	XM_019535486.1			XM_019546281.1	XM_019541293.1	XM_019548905.1	XM_019533567.1	XM_019548405.1		XM_019532994.1	XM_019546846.1	XM_019546847.1	XM_019528599.1		XM_019530459.1		XM_019555427.1	XM_019556341.1	XM_019542303.1	XM_019545178.1		XM_019542360.1	XM_019535830.1	XM_019536553.1		XM_019542891.1	XM_019533835.1	XM_019555411.1
		Gavialis gangeticus	XM_019521118.1	XM_019526640.1	XM_019525607.1	XM_019505904.1	XM_019527887.1		XM_019513857.1	XM_019511692.1	XM_019527293.1	XM_019504230.1	XM_019523650.1		XM_019503581.1	XM_019514061.1	XM_019514060.1			XM_019525671.1		XM_019517147.1	XM_019502616.1	XM_019515853.1	XM_019514964.1		XM_019516476.1	XM_019505606.1	XM_019504656.1		XM_019503745.1	XM_019503967.1	XM_019517504.1
